# Supplementary material
Source: Springer Nature journal article supplement (https://www.springermedizin.de/resource/supplementary/12865_2013_578_MOESM2_ESM.pdf/9428274)

**A**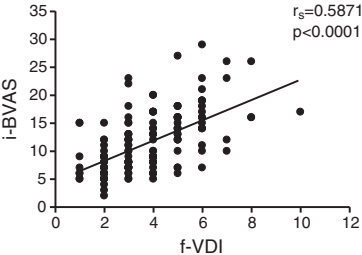**B**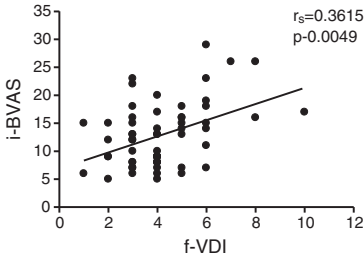

Supplement: MOESM2 [file 9428274]
